# Supplementary material for: Effects of Acute Insulin-Induced Hypoglycemia on Indices of Inflammation: Putative mechanism for aggravating vascular disease in diabetes
Source: PubMed Central journal article supplement — Diabetes Care. 2010 Jul;33(7):1591–7. doi: 10.2337/dc10-0013 (PMC2890364; doi:10.2337/dc10-0013), 2010-07
Supplement: supp_dc10-0013_onlineappendix.pdf [file supp_dc10-0013_onlineappendix.pdf]

**Online appendix 1- Indices of inflammation: Percentage change from baseline**

|                    | Non-diabetic subjects |          |        |       |              |          |        |        | Subjects with type 1 diabetes |          |        |        |              |          |        |        |
|--------------------|-----------------------|----------|--------|-------|--------------|----------|--------|--------|-------------------------------|----------|--------|--------|--------------|----------|--------|--------|
|                    | Euglycemia            |          |        |       | Hypoglycemia |          |        |        | Euglycemia                    |          |        |        | Hypoglycemia |          |        |        |
| Time               | test                  | recovery | +6     | +24   | test         | recovery | +6     | +24    | test                          | recovery | +6     | +24    | test         | recovery | +6     | +24    |
| tPA (ng/ml)        | -7.7                  | -12.6    | -5.1   | +15.4 | +14.5        | -16.9    | -10.3  | +4.4   | +16.0                         | +4.8     | +45.1  | +36.7  | +13.4        | -2.3     | +1.3   | +26.8  |
| vWF (iu/ml)        | -6.1                  | -3.7     | -1.2   | +4.9  | -1.2         | +8.5     | +9.7   | +8.5   | -6.5                          | 0        | -6.5   | +8.7   | +2.1         | -2.1     | -3.2   | +9.7   |
| CD40 (%)           | +47.6                 | +58.9    | -44.3  | +36.4 | -23.4        | -19.2    | +3.1   | +63.0  | +0.2                          | +13.7    | +9.0   | +19.5  | +50.1        | -8.9     | +32.2  | +27.3  |
| sCD40L (ng/ml)     | -10.0                 | -10.4    | -1.8   | +14.9 | -2.7         | -11.4    | -3.4   | -3.1   | -0.3                          | -0.7     | +1.7   | +13.6  | +1.5         | -7.7     | -9.2   | +2.3   |
| IL-6 (pg/ml)       | +23.2                 | +22.0    | +595.3 | +43.0 | +38.5        | +125.0   | +506.9 | +38.8  | +100.0                        | +128.0   | +226.0 | +72.4  | -4.9         | +45.4    | +156.1 | +61.9  |
| hsCRP (ng/ml)      | +17.3                 | +13.4    | +19.2  | +25.9 | -1.0         | -14.7    | -7.6   | +3.8   | -12.7                         | -7.9     | -23.8  | +34.9  | -4.2         | -4.9     | +1.7   | -17.6  |
| P-selectin (ng/ml) | -9.3                  | -5.4     | +3.6   | +2.1  | +0.9         | +3.5     | +12.6  | +12.9  | -3.5                          | -5.7     | -4.7   | +6.5   | -0.5         | -6.7     | -1.5   | +0.7   |
| PMA (%)            | -15.7                 | -14.2    | +20.0  | +24.2 | +329.1       | +354.1   | +365.2 | +384.7 | -40.6                         | +128.1   | +62.5  | +231.2 | -40.0        | -37.7    | -6.7   | +126.6 |
